# Supplementary material for: Comprehensive Assessment of the Association between FCGRs polymorphisms and the risk of systemic lupus erythematosus: Evidence from a Meta-Analysis
Source: PubMed Central journal article supplement (PMC4990922; doi:10.1038/srep31617), 2016-08-19
Supplement: srep31617-s1.pdf [file srep31617-s1.pdf]

# Comprehensive Assessment of the Association between *FCGRs* polymorphisms and the risk of systemic lupus erythematosus: Evidence from a Meta-Analysis

Xiao-Wei Zhu<sup>1,2,#</sup>, Yong Wang<sup>3,#</sup>, Yi-Hua Wei<sup>4,#</sup>, Pian-Pian Zhao<sup>1</sup>, Xiao-Bo Wang<sup>2</sup>, Jing-Jing Rong<sup>1</sup>, Wen-Ying Zhong<sup>2</sup>, Xing-Wei Zhang<sup>1</sup>, Li Wang<sup>1</sup>, Hou-Feng Zheng<sup>1,2</sup>

1 Institute of Aging Research, School of Medicine, Hangzhou Normal University, Hangzhou, Zhejiang, China

2 Department of Dermatology, the Affiliated Hospital of Hangzhou Normal University, Hangzhou, Zhejiang, China

3 Department of Cardiovascular Medicine, the Second People's Hospital of Wuhu City, Wuhu, Anhui, China

4 Department of Dermatology, The Affiliated Hospital of Binzhou Medical University, Binzhou, Shandong, China

# Contributed equally to this work.

Corresponding author: Hou-Feng Zheng (hfzheng@hznu.edu.cn) Institute of Aging Research, School of Medicine, Hangzhou Normal University, and The Affiliated Hospital of Hangzhou Normal University, Hangzhou, Zhejiang, China

**Supplementary Fig S1a.** Forest plot for the meta-analysis of the association between FCGRs polymorphisms and SLE. (FCGR2A rs1801274 and SLE (AA/AG vs GG))

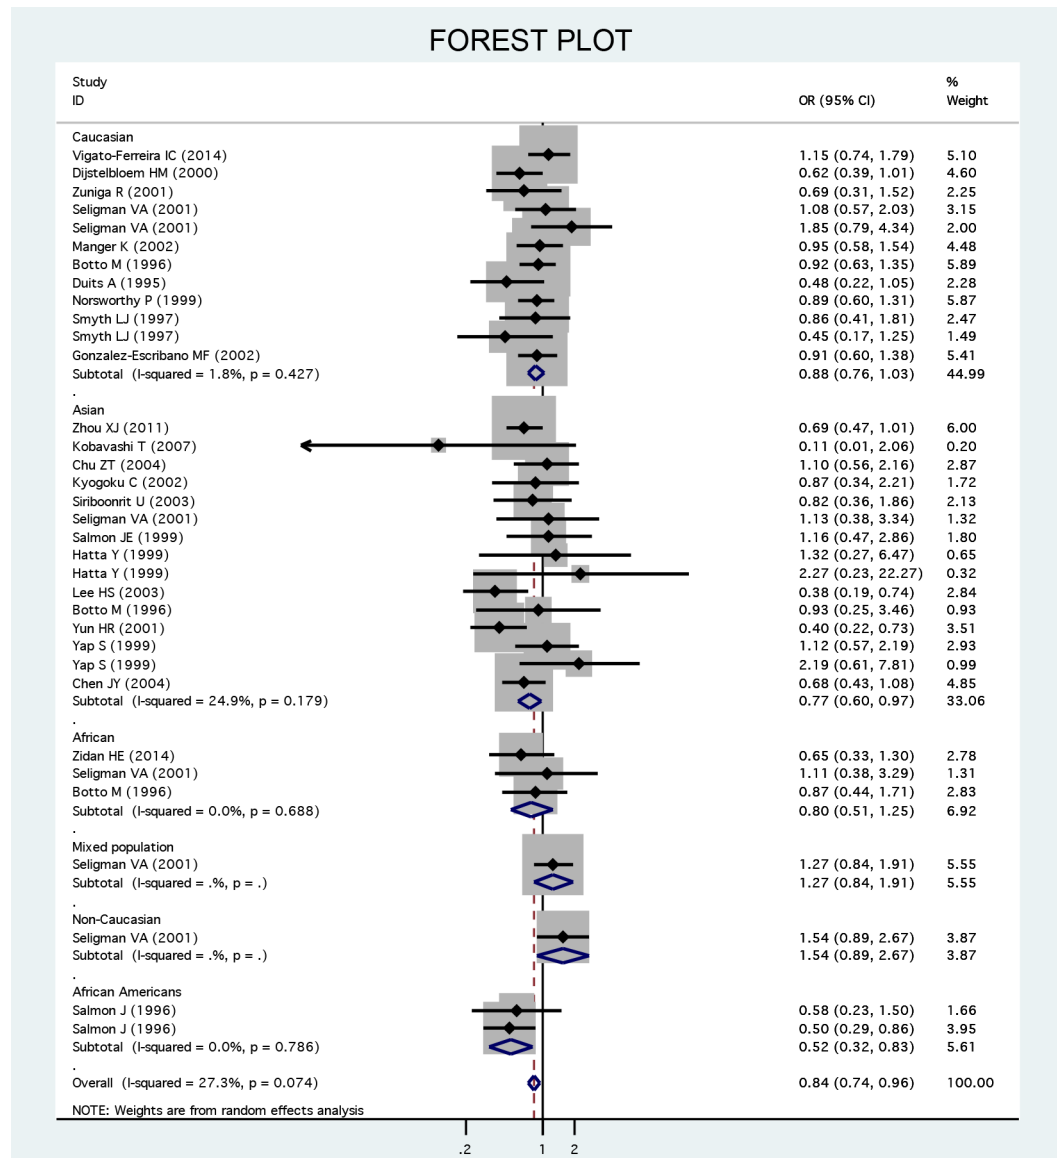

**Supplementary Fig S1b.** Forest plot for the meta-analysis of the association between FCGRs polymorphisms and SLE. (FCGR2B rs1050501 and SLE (CC/CT vs TT))

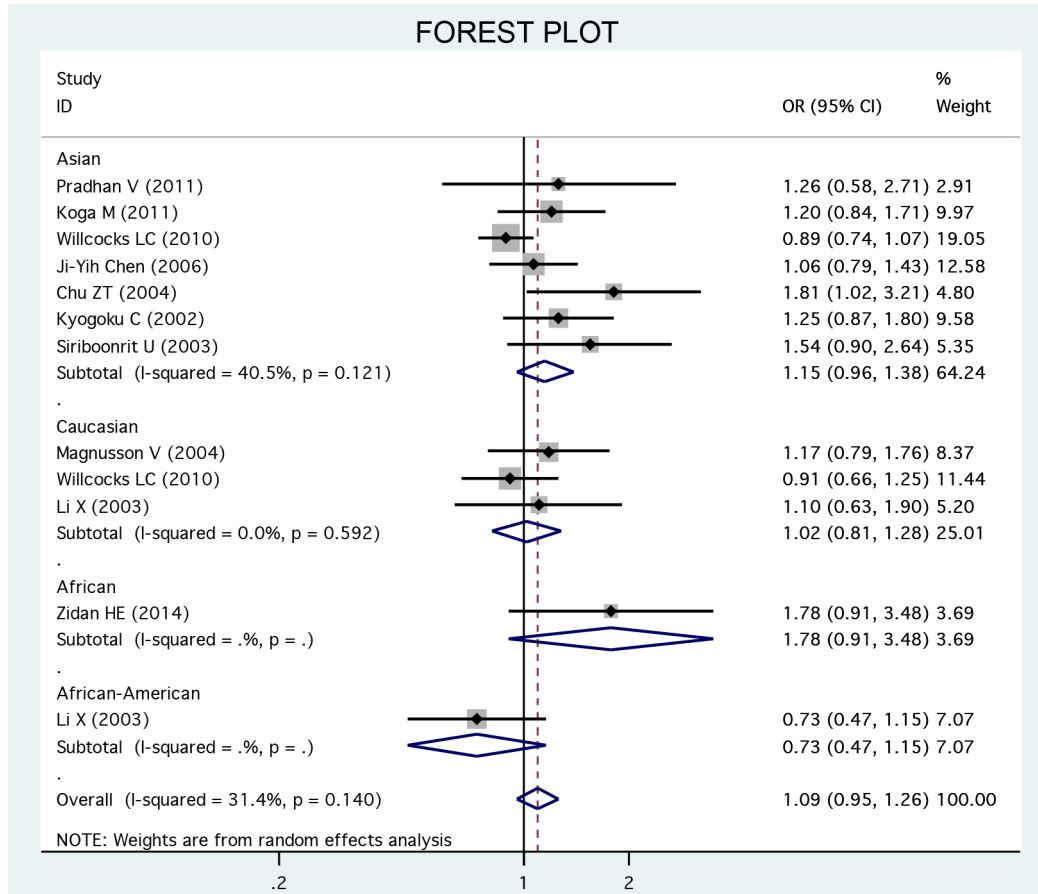

**Supplementary Fig S1c.** Forest plot for the meta-analysis of the association between FCGRs polymorphisms and SLE. (FCGR3A rs396991 and SLE (TT/TG vs GG))

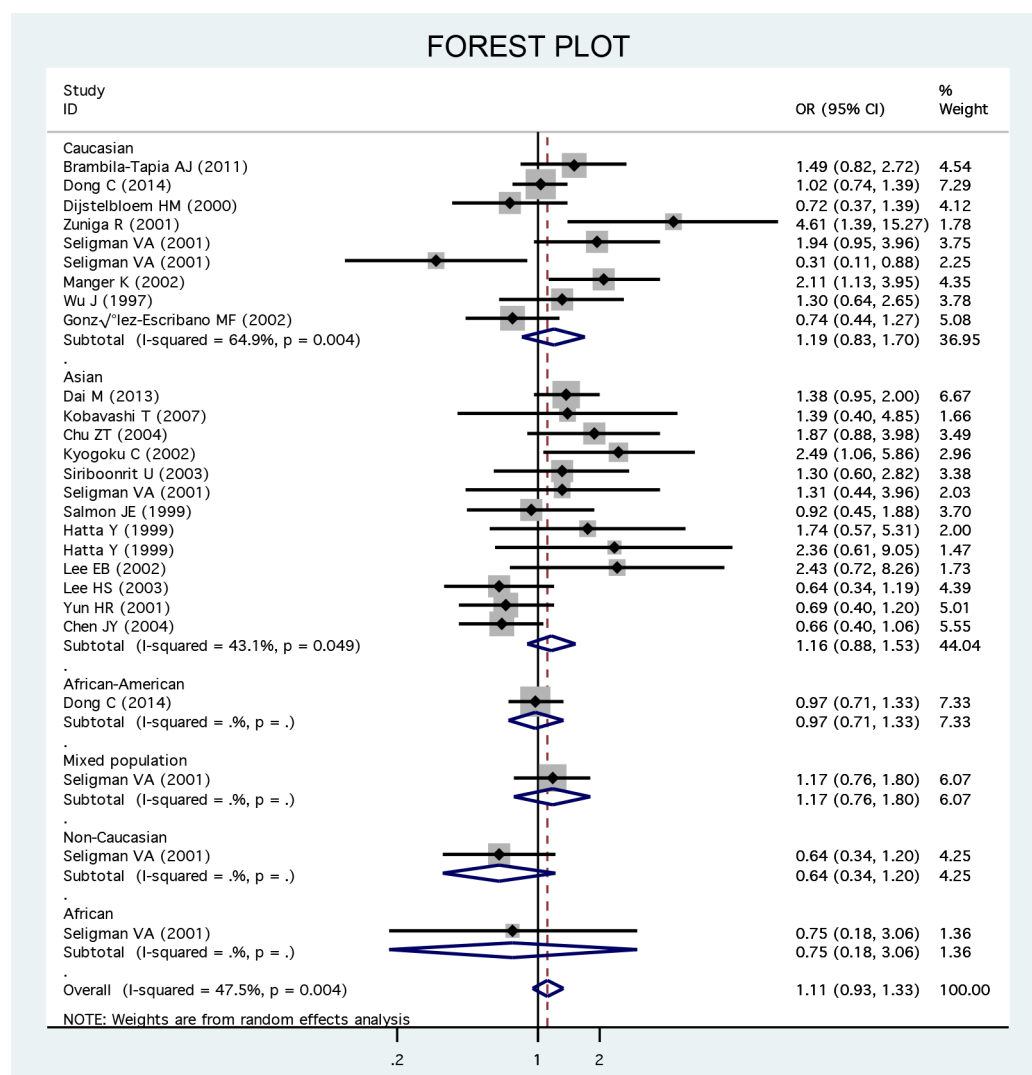

**Supplementary Fig S1d.** Forest plot for the meta-analysis of the association between FCGRs polymorphisms and SLE. (FCGR3B NA1•NA2 and SLE (NA1 NA1/ NA1 NA2 vs NA2 NA2))

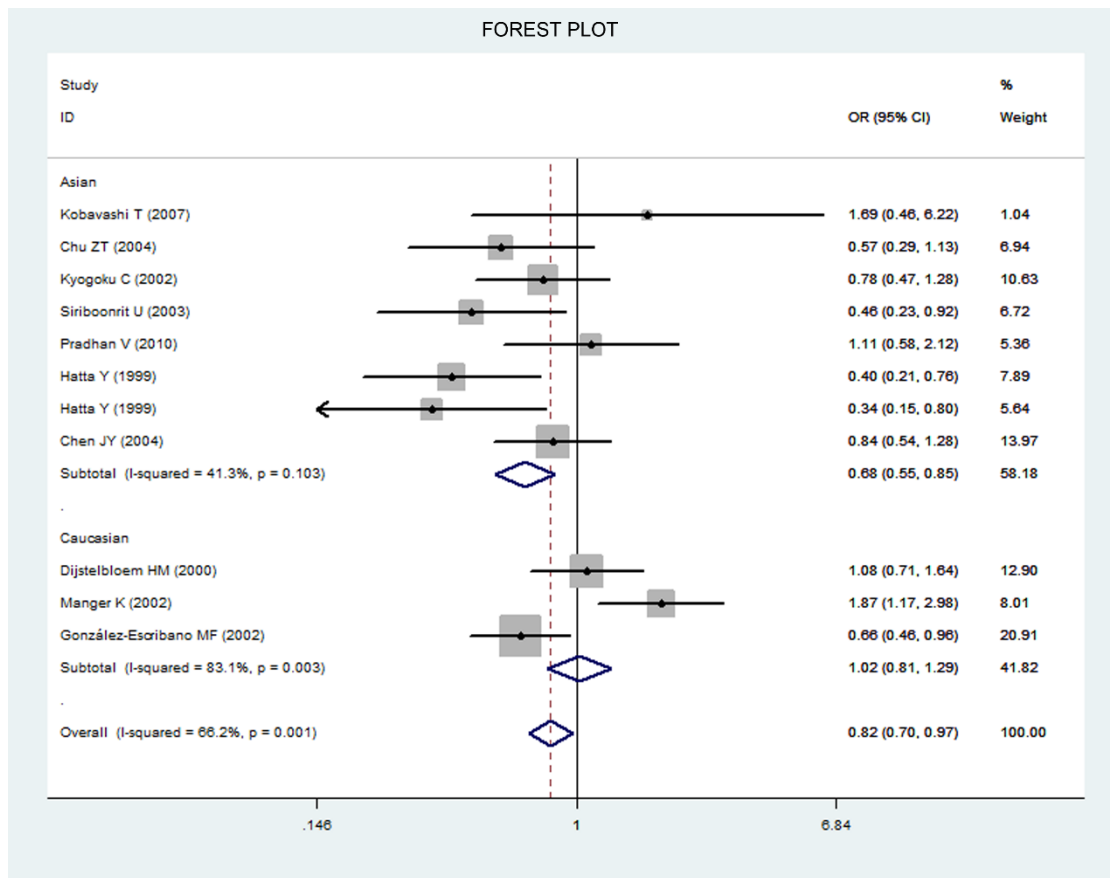

**Supplementary Fig S2a.** Forest plot for the meta-analysis of the association between FCGRs polymorphisms and SLE. (FCGR2A rs1801274 and SLE (AA vs AG/GG))

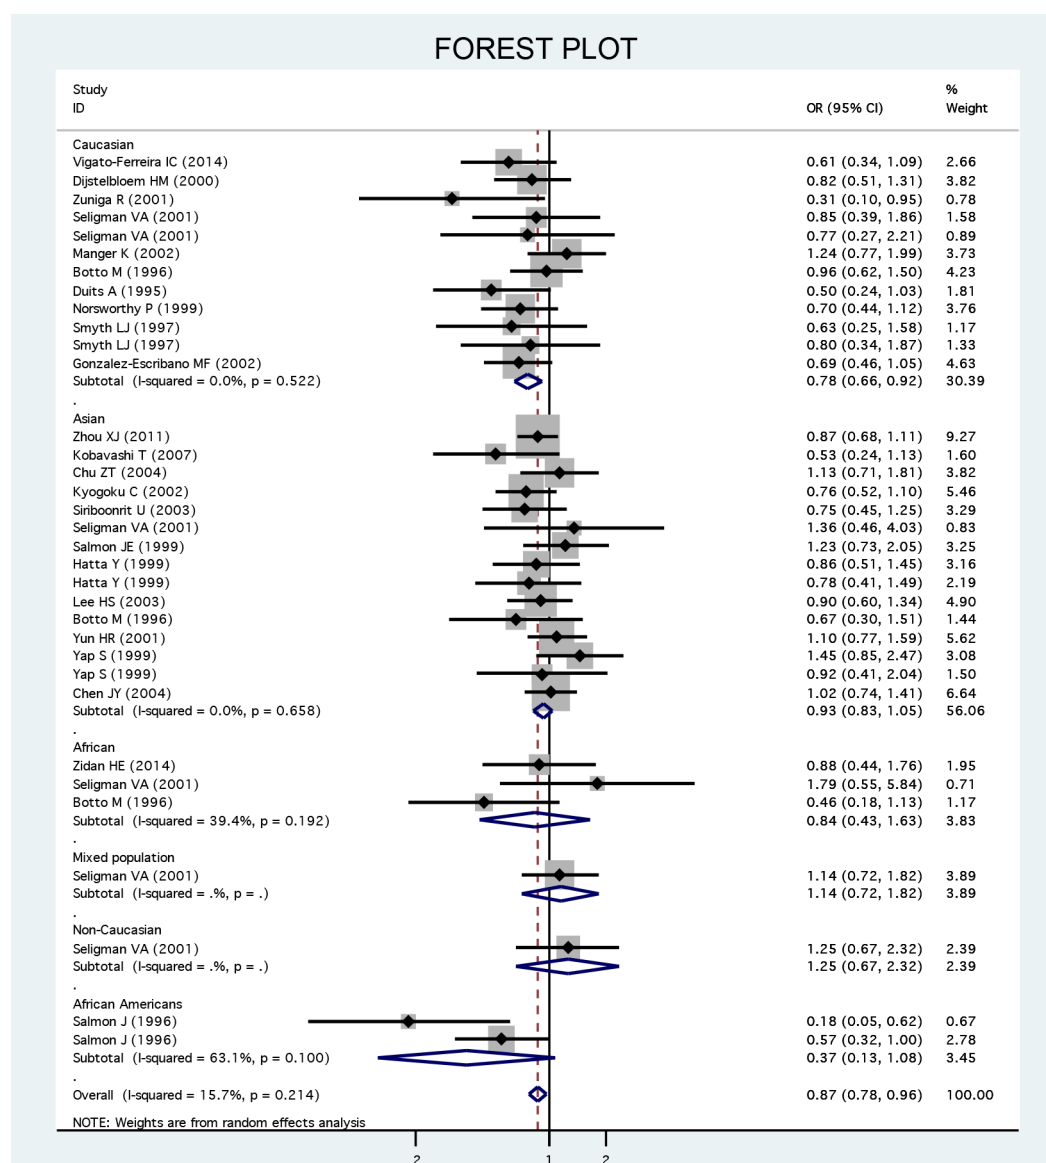

**Supplementary Fig S2b.** Forest plot for the meta-analysis of the association between FCGRs polymorphisms and SLE. (FCGR2B rs1050501 and SLE (C vs T))

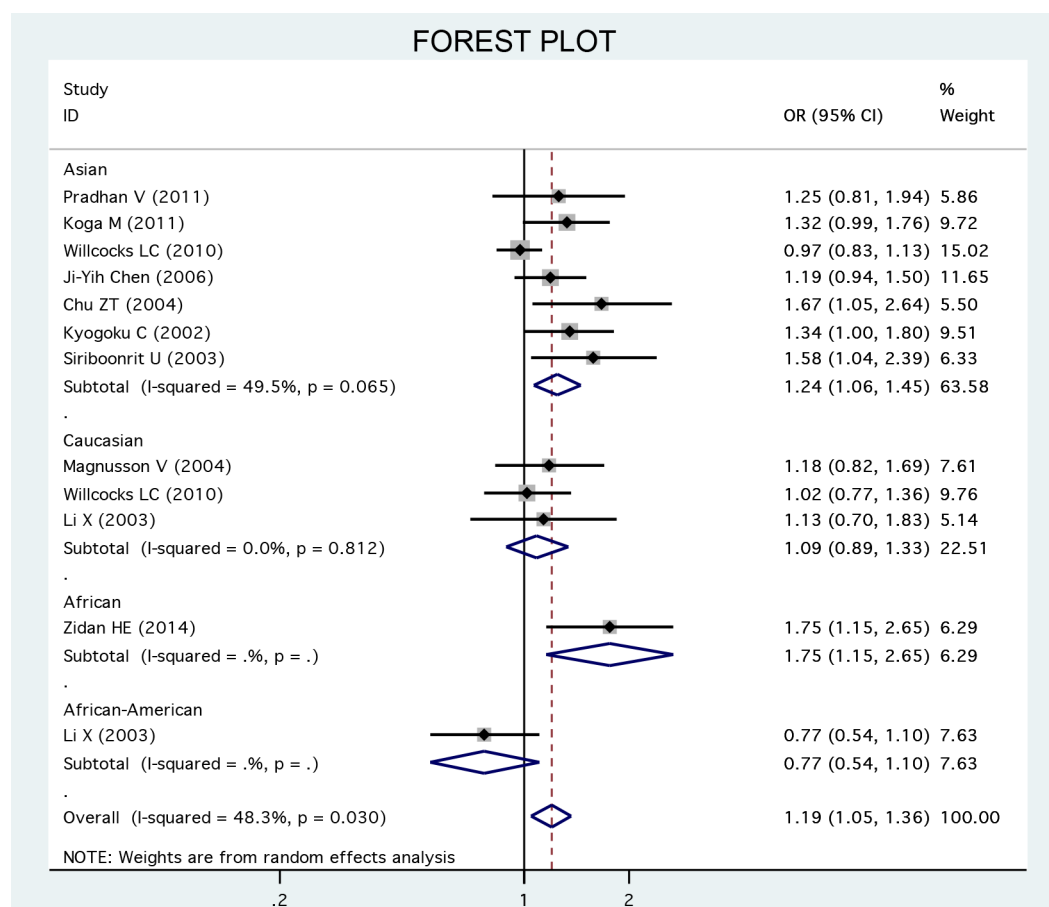

**Supplementary Fig S2c.** Forest plot for the meta-analysis of the association between FCGRs polymorphisms and SLE. (FCGR3A rs396991 and SLE (T vs G))

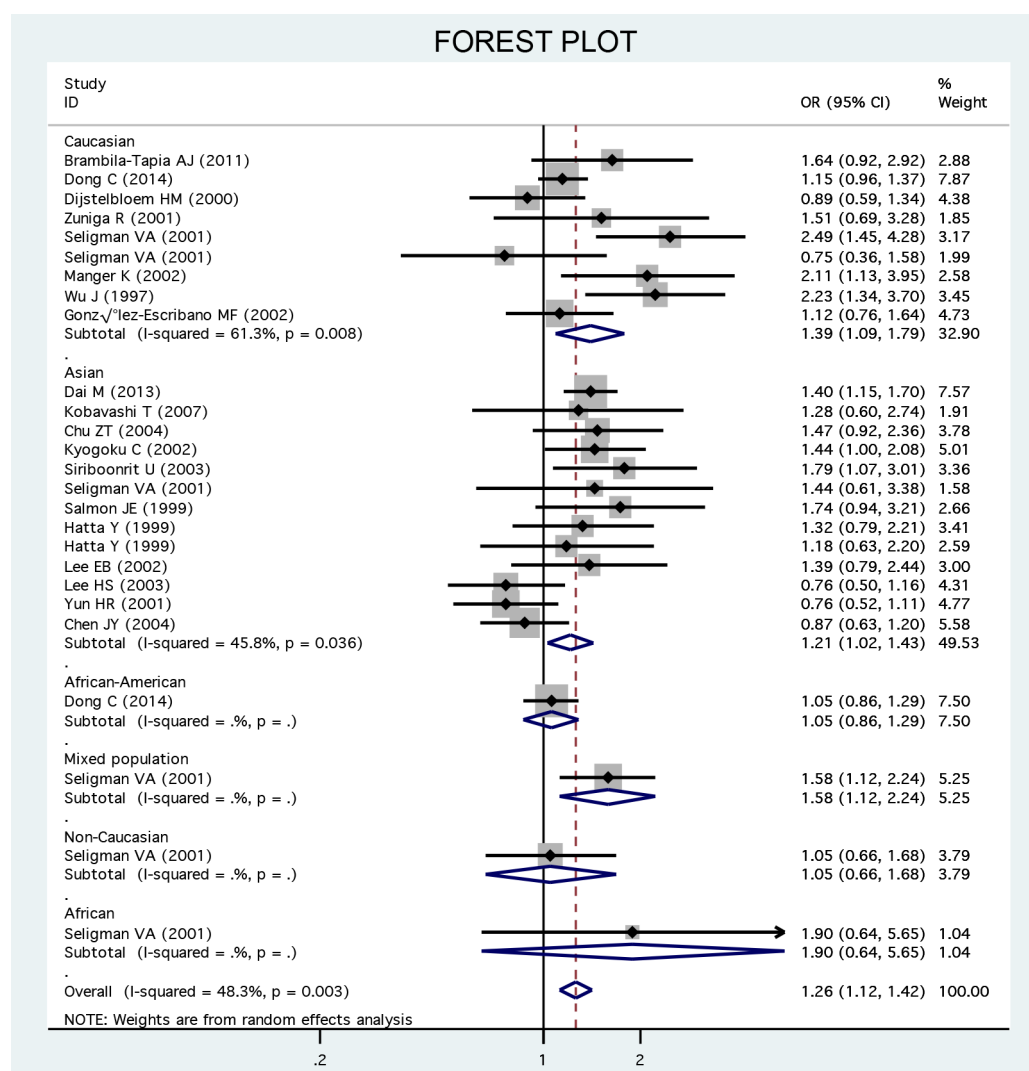



**Supplementary Fig S2d.** Forest plot for the meta-analysis of the association between FCGRs polymorphisms and SLE. (FCGR3B NA1•NA2 and SLE (NA1NA1 vs NA1NA2/NA2NA2))

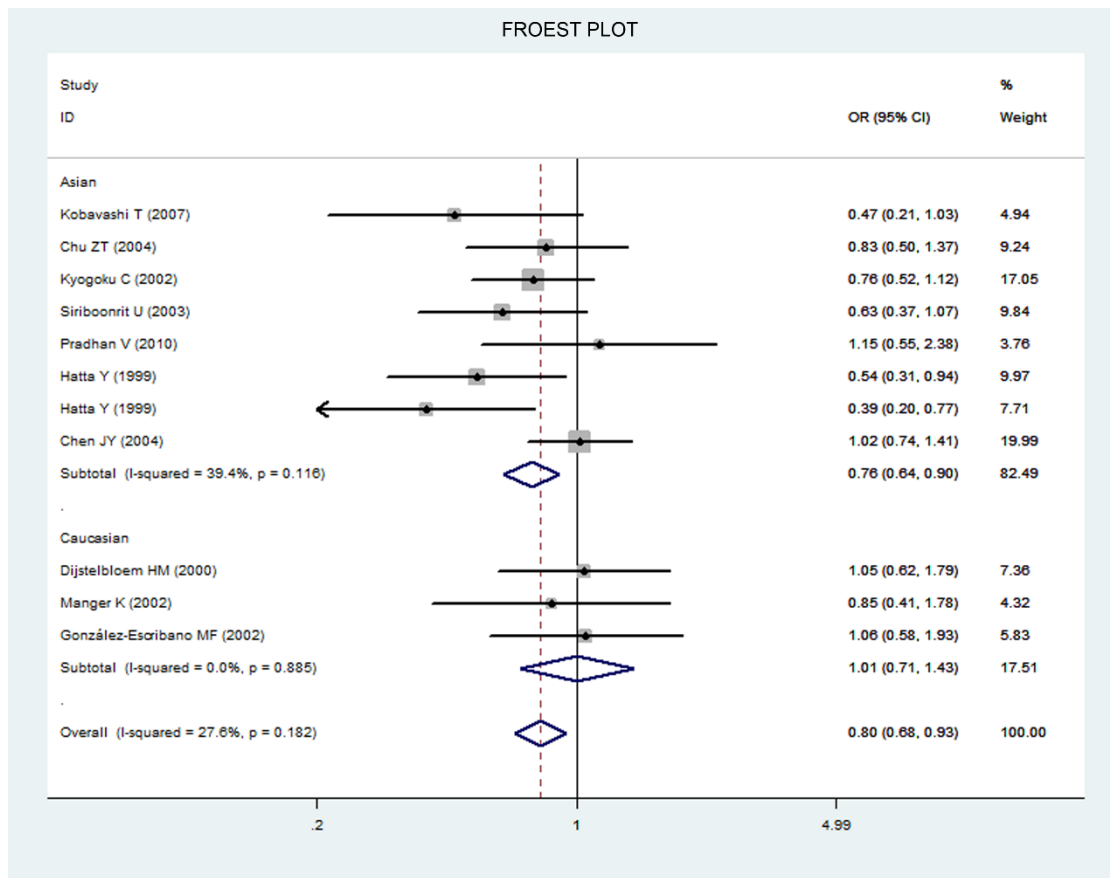

**Supplementary Table S1** Begg's Test of publication under three models

|                   | allele model |       | Recessive model |       | Dominant model |       |
|-------------------|--------------|-------|-----------------|-------|----------------|-------|
|                   | Z            | P     | Z               | P     | Z              | P     |
| FCGR2A(rs1801274) | 0.53         | 0.594 | 1.16            | 0.248 | 0.77           | 0.441 |
| FCGR2B(rs1050501) | 1.58         | 0.115 | 0.21            | 0.837 | 1.85           | 0.064 |
| FCGR3A(rs396991)  | 1.15         | 0.252 | 1.54            | 0.123 | 2.07           | 0.038 |
| FCGR3B(NA1•NA2)   | 1.25         | 0.213 | 0.93            | 0.350 | 0.93           | 0.350 |
